# Supplementary material
Source: PubMed Central journal article supplement (PMC3795796)
Supplement: NIHMS481913-supplement-1_si_001.pdf [file NIHMS481913-supplement-1_si_001.pdf]

**“Super mutant” of yeast FMN adenylyltransferase enhances enzyme turnover  
rate by attenuating product inhibition**

Carlos Huerta<sup>1</sup>, Nick V. Grishin<sup>1,2</sup> and Hong Zhang<sup>1\*</sup>

<sup>1</sup>Department of Biophysics and <sup>2</sup>Howard Hughes Medical Institute, University of Texas  
Southwestern Medical Center, 5323 Harry Hines Blvd., Dallas, Texas 75390

Supporting Information

## MATERIAL AND METHODS

### Mutagenesis, protein expression and purification

CgFMNAT mutants N62A, N62S, D66A, D168A, D181A, W184A, R297A, R300A and the deletion of the last three lysines ( $\Delta 3K$ ) were generated using QuikChange™ site-directed mutagenesis procedure (Invitrogen) on the template vector pHIS parallel containing the wt CgFMNAT coding sequence (*I*). Incorporation of the desired mutant constructs were confirmed by DNA sequencing (Supplementary Material **Table S1**).

For large scale protein expression and purification, the expression vectors harboring mutant CgFMNAT DNA were transformed into *E. coli* BL21(DE3) (Novagen) and cells were grown in 1 L Luria-Bertani (LB) broth containing 100  $\mu$ g/ml ampicillin. Cultures were grown at 37 °C to an absorption of 0.6 at 600 nm and induced overnight at 20 °C by the addition of 0.8 mM isopropyl  $\beta$ -D-thiogalactoside. Cells were harvested by centrifugation, resuspended in the lysis buffer (20 mM HEPES, pH 8.0, 100 mM NaCl, 0.03% Brij-35 and 10% glycerol) supplemented with 2 mM PMSF and 1 mM DTT, and completely lysed by sonication. Clarified cell lysate was loaded on a nickel-sepharose affinity column (GE Healthcare) equilibrated with Buffer A (20 mM HEPES, pH 8.0, 300 mM NaCl, 20 mM imidazole, 5% glycerol and 1 mM DTT) and the His<sub>6</sub>-tagged CgFMNAT was eluted with a 20–500 mM imidazole gradient. The His<sub>6</sub>-tag was then cleaved with TEV protease during overnight dialysis to a buffer containing 20 mM HEPES, pH 7.5, 50 mM NaCl, 5% glycerol and 1 mM DTT at 4 °C. The protein with removed His<sub>6</sub>-tag was recovered by passing the sample through the nickel-sepharose column a second time. The tag-free CgFMNAT was loaded onto a Resource Q anion exchange column (GE Healthcare) equilibrated with 20 mM HEPES, pH 7.5, 5% glycerol and 1 mM DTT, and eluted with a 0–350 mM NaCl gradient. To remove the intrinsically bound flavin, the protein

was incubated with 1.5 M ammonium sulfate and loaded onto a phenyl-sepharose hydrophobic-interaction chromatography column equilibrated with 20 mM HEPES, pH 7.5 and 1.5 M ammonium sulfate. The protein was eluted with a 1.5 M–0 M ammonium sulfate gradient. The purified protein was then dialyzed into a buffer containing 20 mM HEPES, pH 7.5, 150 mM NaCl and 1 mM DTT. The phenyl-sepharose chromatography step was omitted for D181A and W184A mutants, as the protein contained no detectable flavin. For CgFMNAT D181A crystallization, the mutant protein was purified using a similar procedure with a final Superdex 75 size exclusion chromatography column following the Resource Q column. Detection of flavin was measured by a UV/visible wavelength scan. Protein purity was monitored by SDS-PAGE and the protein concentration was determined by Bio-Rad protein assay.

### **Steady-state kinetics analysis**

A continuous spectrophotometric assay that couples the release of the product inorganic pyrophosphate ( $PP_i$ ) to the generation of 2-amino-6-mercapto-7-methylpurine (2, 3) was used. To measure the specific activity (nmole/min/mg protein), the reaction mixture (0.25 mL) contained 20 mM HEPES, pH 7.5, 2 mM magnesium chloride, 10 units purine nucleoside phosphorylase, 1 unit inorganic pyrophosphatase ( $PP_i$ ase), 0.2 mM 2-amino-6-mercapto-7-methylpurine riboside, 20  $\mu$ M FMN, 100  $\mu$ M ATP and 21 nM of CgFMNAT protein. Protein concentrations used were: 40 nM for N62A, 80 nM for N62S, 160 nM for D168A, 7 nM for D181A, 300 nM for W184A, 15.8 nM for R297A, 87.5 nM for R300A, and 110 nM for  $\Delta$ 3K. To obtain the apparent  $K_{m, \text{FMN}}$ , ATP was held at a saturating concentration of 100  $\mu$ M for native CgFMNAT, D181A and R297A, and 400  $\mu$ M for the remaining CgFMNAT mutants, while FMN was varied between 1-800  $\mu$ M. To obtain the apparent  $K_{m, \text{ATP}}$ , FMN was held at a saturating concentration of 40  $\mu$ M for D168A and R300A; 400  $\mu$ M for W184A and 20  $\mu$ M for

the remaining CgFMNAT mutants, while ATP was varied between 1-1000  $\mu\text{M}$ . All reactions were carried out in duplicates or triplicates and performed at 25  $^{\circ}\text{C}$ . The reaction was initiated by the addition of CgFMNAT enzymes, and the progress was monitored by measuring the absorption at wavelength 355 nm for 10 minutes. For native and mutant CgFMNATs the apparent steady-state kinetic parameters were determined by fitting the initial rates to the general Michaelis-Menten equation (1) (Eq. (1)).

$$v = \frac{V_{max,app}[S]}{(K_{m,app} + [S])} \quad (1)$$

$K_{m,app}$  is the apparent Michaelis-Menten constant, and  $[S]$  is the concentration of ATP when FMN is at saturated concentration or FMN when ATP is at saturated concentration. A nonlinear least-squares method as implemented in Sigma Plot was used to fit the data.

### **Product inhibition analysis**

The malachite green end-point assay was utilized to measure product inhibition by FAD to avoid the potential interference from the flavin absorption (4-6). To determine the effect of FAD on the initial rates, three different time points were collected within the linear range of the reaction for the wt and D181A mutant. The reaction mixture (0.3 ml) contained 20 mM HEPES, pH 7.5, 2 mM magnesium chloride, 0.06 units inorganic pyrophosphatase (PPase), 21 nM CgFMNAT or 5 nM D181A, and appropriate amount of ATP, FMN, and FAD. In the reaction mixture, the concentration of the fixed substrate ATP or FMN was 6  $\mu\text{M}$  and 4  $\mu\text{M}$  for CgFMNAT, and 50  $\mu\text{M}$  and 6  $\mu\text{M}$  for D181A, respectively. Inhibition by the product was conducted at FAD concentrations of 0, 0.1, 0.4 and 0.8  $\mu\text{M}$ . For product inhibition with respect to ATP, the FMN concentration was held constant while the ATP concentration was varied between 2-100  $\mu\text{M}$  for native FMNAT and 5-100  $\mu\text{M}$  for D181A mutant. For product inhibition with respect to FMN, the ATP concentration was held constant while the FMN concentration

was varied between 1-20  $\mu\text{M}$ . CgFMNATs were pre-incubated with the appropriate concentration of FAD for 30 minutes on ice before adding to the reaction mixture to initiate the reaction. The reaction was allowed to progress for 1 to 18 minutes, and was stopped by the addition of 300  $\mu\text{L}$  malachite green reagent. The color development was quenched after 2 minutes with 60  $\mu\text{L}$  of quenching solution and incubated for 20 minutes at 25  $^{\circ}\text{C}$  before measuring the absorbance at wavelength 650 nm. As a blank, CgFMNAT enzyme was left out of the reaction mixture.

The stock solutions for the assay were prepared as following (5, 6): reagent A, 41.9 mM ammonium molybdate in ddH<sub>2</sub>O; reagent B, 3.1 M H<sub>2</sub>SO<sub>4</sub>; reagent C, 1.13 mM malachite green in ddH<sub>2</sub>O; and reagent D, 0.660 % poly (vinyl alcohol) in ddH<sub>2</sub>O. The malachite green reagent was prepared by mixing the reagents to provide a final solution of 12.04 mM ammonium molybdate, 0.9 M H<sub>2</sub>SO<sub>4</sub>, 0.24 mM malachite green, 0.14 % poly (vinyl alcohol). The malachite green reagent was filtered using a 0.2  $\mu\text{m}$  syringe filter. A quenching solution was prepared with 40% (w/v) trisodium citrate dihydrate. All reagents were stored at 4 $^{\circ}\text{C}$ .

The effect of product inhibition by FAD on the initial rates of wt and D181A CgFMNAT were fitted to the general inhibition equation (2) (commonly referred to as mixed-type inhibition) for readily reversible inhibitors (7, 8) (Eq. (2)).

$$v = \frac{V_{max}[S]}{(K_m(1 + [I]/K_i) + [S](1 + [I]/\alpha K_i))} \quad (2)$$

where  $K_i$  is the inhibition constant,  $\alpha$  is a quantitative parameter that provides a measure of the type of inhibition (7, 8), and  $[I]$  is the concentration of the inhibitor (FAD). A nonlinear least-squares method as implemented in the Sigma Plot Enzyme Kinetics module was used to fit the data globally.

## Crystallization and structure determination of D181A mutant

The purified D181A mutant protein was concentrated to 21 mg/mL. The crystals were grown by mixing 1.5  $\mu$ l of protein with 1.5  $\mu$ l of reservoir solution composed of 0.1 M Na acetate, pH 4.4-5.4 and 6-12% (w/v) PEG 4000, and equilibrating against the reservoir at 16 °C in a hanging-drop vapor diffusion setting. The reagents and greased 24-well plates were chilled on ice before setting up crystallization drops. All crystals were cryoprotected in a solution containing all the reservoir components and increments of glucose (10%, 20% and 30%), flash-frozen in liquid propane and stored in liquid nitrogen. The 1.7 Å dataset was collected in-house with X-ray from a rotating anode generator (Rigaku FRE SuperBright), recorded on an RAXIS IV (Rigaku) image plate detector. The data was processed with the HKL2000 package (9) and the phases were determined by the molecular replacement method using program Phaser (10) and the apo-CgFMNAT structure (PDB ID: 3FWK) as the search model. The refinements were performed using REFMAC (11) and manual model building was performed with Coot (12). Model quality was assessed by MolProbity (13). Data collection and refinement statistics are presented in **Table S3**. The conformation of the D181A protein is essentially the same as the wt CgFMNAT with a root mean square deviation of all C $_{\alpha}$  atoms to be 0.07Å. The atomic coordinates and structure factors have been deposited with the Protein Data Bank (PDB) under accession code 4KKV.

## REFERENCES

1. Huerta, C., Borek, D., Machius, M., Grishin, N. V., and Zhang, H. (2009) Structure and mechanism of a eukaryotic FMN adenylyltransferase, *J Mol Biol* 389, 388-400.
2. Webb, M. R. (1992) A continuous spectrophotometric assay for inorganic phosphate and for measuring phosphate release kinetics in biological systems, *Proc Natl Acad Sci U S A* 89, 4884-4887.
3. Upson, R. H., Haugland, R. P., Malekzadeh, M. N., and Haugland, R. P. (1996) A spectrophotometric method to measure enzymatic activity in reactions that generate inorganic pyrophosphate, *Anal Biochem* 243, 41-45.
4. Rumsfeld, J., Ziegelbauer, K., and Spaltmann, F. (2000) High-throughput assay for inorganic pyrophosphatases using the cytosolic enzymes of *Saccharomyces cerevisiae* and human as an example, *Protein Expr Purif* 18, 303-309.
5. Cogan, E. B., Birrell, G. B., and Griffith, O. H. (1999) A robotics-based automated assay for inorganic and organic phosphates, *Anal Biochem* 271, 29-35.
6. Newton, G. L., Ta, P., Sareen, D., and Fahey, R. C. (2006) A coupled spectrophotometric assay for l-cysteine:1-D-myo-inositol 2-amino-2-deoxy-alpha-D-glucopyranoside ligase and its application for inhibitor screening, *Anal Biochem* 353, 167-173.
7. Kolobe, D., Sayed, Y., and Dirr, H. W. (2004) Characterization of bromosulphophthalein binding to human glutathione S-transferase A1-1: thermodynamics and inhibition kinetics, *Biochem J* 382, 703-709.
8. Segel, I. H. (1993) *Enzyme Kinetics: Behavior and Analysis of Rapid Equilibrium and Steady-State Enzyme Systems*, Wiley-Interscience, New York.
9. Otwinowski, Z., and Minor, W. (1997) Processing of X-ray diffraction data collected in oscillation mode, *Macromolecular Crystallography, Pt A* 276, 307-326.
10. McCoy, A. J., Grosse-Kunstleve, R. W., Adams, P. D., Winn, M. D., Storoni, L. C., and Read, R. J. (2007) Phaser crystallographic software, *J Appl Crystallogr* 40, 658-674.
11. Murshudov, G. N., Vagin, A. A., and Dodson, E. J. (1997) Refinement of macromolecular structures by the maximum-likelihood method, *Acta crystallographica. Section D, Biological crystallography* 53, 240-255.
12. Emsley, P., Lohkamp, B., Scott, W. G., and Cowtan, K. (2010) Features and development of Coot, *Acta Crystallographica Section D* 66, 486-501.
13. Davis, I. W., Murray, L. W., Richardson, J. S., and Richardson, D. C. (2004) MOLPROBITY: structure validation and all-atom contact analysis for nucleic acids and their complexes, *Nucleic Acids Res* 32, W615-619.

**Table S1. Primers used for *Cg*FMNAT mutagenesis**

| Mutant <sup>a</sup> | Primer Sequence <sup>b</sup>                                                                                                                |
|---------------------|---------------------------------------------------------------------------------------------------------------------------------------------|
| N62A (AAT→GCT)      | 5'-GGTGAAATATCGTTTTCTAT <u>GCT</u> GGAGGCAAAGACTGCCAGGTG-3'<br>3'-CCACTTTATAGCAAAGGATAC <u>GAC</u> CTCCGTTTCTGACGGTCCAC-5'                  |
| N62S (AAT→TCA)      | 5'-GGTGAAATATCGTTTTCTAT <u>TCA</u> GGAGGCAAAGACTGCCAGGTG-3'<br>3'-CCACTTTATAGCAAAGGATA <u>AGT</u> CTCCGTTTCTGACGGTCCAC-5'                   |
| D66A (GAC→GCT)      | 5'-CGTTTTCTATAATGGAGGCAAAG <u>GCT</u> TGCCAGGTGCTGTTATTACTATA-3'<br>3'-GCAAAGGATATTACCTCCGTTT <u>CGA</u> ACGGTCCACGACAATAATGATAT-5'         |
| D168A (GAT→GCT)     | 5'-GTCATCGGTATAAGACACACT <u>GCT</u> CCATTTGGCGAGCATTTAAAG-3'<br>3'-CAGTAGCCATATTCTGTGTG <u>ACG</u> AGGTAAACCGCTCGTAAATTTTC-5'               |
| D181A (GAT→GCT)     | 5'-AAGCCTATTCAAAAGACAG <u>GCT</u> GCTAATTGGCCAGATTTTC-3'<br>3'-ITCGGATAAGTTTTCTGT <u>CGA</u> CGATTAACCGGTCTAAAG-5'                          |
| W184A (TGG→GCT)     | 5'-CCTATTCAAAAGACAGATGCTAAT <u>GCT</u> CCAGATTTCTATCGTCTACAACCT-3'<br>3'-GGATAAGTTTTCTGTCTACGATTAC <u>GAG</u> GTCTAAAGATAGCAGATGTTGGA-5'    |
| R297A (AGA→GCT)     | 5'-GTACCTAGTCGATGACAACTTGAAG <u>GCT</u> GCAGGAAGAATTA AAAAGAAATGAG-3'<br>3'-CATGGATCAGCTACTGTTGAACTT <u>CGA</u> CGTCCTTCTTAATTTTCTTTACTC-5' |
| Δ3K (AAA→TAA)       | 5'-TGAAAGAGCAGGAAGAATTTAA <u>AA</u> AAGAAATGAGTCGACGAGC-3'<br>3'-ACTTTCTCGTCCTTCTTAA <u>ATT</u> TTCTTTACTCAGCTGCTCG-5'                      |

<sup>a</sup>Codons in parenthesis list the change from the native codon to the mutant codon.

<sup>b</sup>The forward and reverse primers for each mutant are listed with the mutagenesis site underlined.



**Table S2. Specific activities of CgFMNAT mutants**

| Protein Constructs | Mutant location | Functional Role                     | Percent Specific Activity |
|--------------------|-----------------|-------------------------------------|---------------------------|
| Native             | n/a             |                                     | 95.7 ± 3.8                |
| N62A               | PP loop         | ATP interaction                     | 45.3 ± 2.8                |
| N62S               | PP loop         | ATP interaction                     | 26.2 ± 3.4                |
| D66A               | PP loop         | Direct ligand to Mg <sup>2+</sup>   | 2.2 ± 0.1                 |
| D168A              | ARG1            | Indirect ligand to Mg <sup>2+</sup> | 7.7 ± 7.3                 |
| D181A              | Flavin          | Isoalloxazine ring interaction      | 761.5 ± 33.7              |
| W184A              | Flavin          | Isoalloxazine ring interaction      | 13.0 ± 5.6                |
| R297A              | ARG2            | ATP and FMN phosphate interaction   | 171.0 ± 17.0              |
| R300A              | ARG2            | ATP and FMN phosphate interaction   | 6.6 ± 6.9                 |
| R297,300A          | ARG2            | ATP and FMN phosphate interaction   | 5.9 ± 3.1                 |
| Δ last K's         | ARG2            |                                     | 95.5 ± 10.1               |

**Table S3. Crystallographic data and refinement statistics of CgFMNAT D181A mutant**

| D181A mutant                                         |                         |
|------------------------------------------------------|-------------------------|
| <b>Data collection</b>                               |                         |
| Space group                                          | P3 <sub>2</sub> 21      |
| Cell dimensions                                      |                         |
| <i>a</i> , <i>b</i> , <i>c</i> (Å)                   | 80.3, 80.3, 78.2        |
| $\alpha$ , $\beta$ , $\gamma$ (°)                    | 90, 90, 120             |
| Resolution (Å)                                       | 50.00-1.74 (1.77-1.74)* |
| <i>R</i> <sub>sym</sub> or <i>R</i> <sub>merge</sub> | 0.053 (0.497)           |
| <i>I</i> / $\sigma I$                                | 21.6 (1.26)             |
| Completeness (%)                                     | 99.3 (95.4)             |
| Redundancy                                           | 5.5 (3.5)               |
| <b>Refinement</b>                                    |                         |
| Resolution (Å)                                       | 24.4-1.74               |
| No. reflections                                      | 28606                   |
| <i>R</i> <sub>work</sub> / <i>R</i> <sub>free</sub>  | 0.172/0.201             |
| No. atoms                                            |                         |
| Protein                                              | 2613                    |
| Water                                                | 332                     |
| Organic                                              | 12                      |
| Inorganic                                            | 1                       |
| <i>B</i> -factors                                    |                         |
| Protein                                              | 21.6                    |
| Water                                                | 31.1                    |
| Organic                                              | 34.7                    |
| Inorganic                                            | 22.6                    |
| R.m.s. deviations                                    |                         |
| Bond lengths (Å)                                     | 0.006                   |
| Bond angles (°)                                      | 1.082                   |

\*Values in parentheses are for highest-resolution shell.
